# Supplementary material for: Mosses as extraordinary reservoir of microbial diversity: a comparative analysing of co-occurring ‘plant-moss twins’ in natural alpine ecosystem
Source: Environ Microbiome. 2025 Jun 4;20:61. doi: 10.1186/s40793-025-00728-z (PMC12139377; doi:10.1186/s40793-025-00728-z)
Supplement: Supplementary file 1 — Supplementary Material 1: Supplementary Table 1 provides detailed sampling information including twin pair id, sampling coordinates, habitat type, host plant identity (vascular plant or moss), and taxonomic classification. [file 40793_2025_728_MOESM1_ESM.xlsx]

## Sheet: Twin_study_sampling_details
sample_ID	sample_point	Plant type	lat	lon	Species	Genus	Family	Order	Class	Phylum	Kingdom	Habitat_notice	Habitat_group
181m	181	Moss	46.8672	13.7338	Dicranum scoparium	Dicranum	Dicranaceae	Dicranales	Bryopsida	Bryophyta	Plantae	thin soil Nardetum (over silicate rock)	Silicate
182m	182	Moss	46.8671	13.7338	Pleurozium schreberi	Pleurozium	Hylocomiaceae	Hypnales	Bryopsida	Bryophyta	Plantae	thin soil Nardetum (over silicate rock)	Silicate
183m	183	Moss	46.8672	13.7336	Polytrichum perigoniale	Polytrichum	Polytrichaceae	Polytrichales	Polytrichopsida	Bryophyta	Plantae	thin soil Nardetum (over silicate rock)	Silicate
184m	184	Moss	46.8672	13.7336	Ceratodon purpureus	Ceratodon	Ditrichaceae	Pseudoditrichales	Bryopsida	Bryophyta	Plantae	thin soil Nardetum (over silicate rock)	Silicate
185m	185	Moss	46.8682	13.733	Polytrichum juniperinum	Polytrichum	Polytrichaceae	Polytrichales	Polytrichopsida	Bryophyta	Plantae	Dwarf shrub heath	Silicate
186m	186	Moss	46.8683	13.733	Cynodontium strumiferum	Cynodontium	Rhabdoweisiaceae	Dicranales	Bryopsida	Bryophyta	Plantae	thin soil over silicate rock	Silicate
187m	187	Moss	46.8688	13.7326	Pterigynandrum filiforme	Pterigynandrum	Pterigynandraceae	Hypnales	Bryopsida	Bryophyta	Plantae	silicate rock	Group-4
188m	188	Moss	46.8693	13.7322	Hylocomium splendens	Hylocomium	Hylocomiaceae	Hypnales	Bryopsida	Bryophyta	Plantae	Dwarf shrub heath	Silicate
189m	189	Moss	46.8695	13.7323	Pleurozium schreberi	Pleurozium	Hylocomiaceae	Hypnales	Bryopsida	Bryophyta	Plantae	Dwarf shrub heath	Silicate
190m	190	Moss	46.8699	13.7323	Ceratodon purpureus	Ceratodon	Ditrichaceae	Pseudoditrichales	Bryopsida	Bryophyta	Plantae	Nardetum	Silicate
191m	191	Moss	46.8699	13.7323	Dicranum scoparium	Dicranum	Dicranaceae	Dicranales	Bryopsida	Bryophyta	Plantae	Nardetum	Silicate
192m	192	Moss	46.87	13.7323	Polytrichum juniperinum	Polytrichum	Polytrichaceae	Polytrichales	Polytrichopsida	Bryophyta	Plantae	Silicate rock fissure	Group-4
193m	193	Moss	46.8709	13.7308	Oligotrichum hercynicum	Oligotrichum	Polytrichaceae	Polytrichales	Polytrichopsida	Bryophyta	Plantae	Nardetum	Silicate
194m	194	Moss	46.871	13.7306	Pogonatum urnigerum	Pogonatum	Polytrichaceae	Polytrichales	Polytrichopsida	Bryophyta	Plantae	Nardetum	Silicate
195m	195	Moss	46.8717	13.7294	Polytrichum perigoniale	Polytrichum	Polytrichaceae	Polytrichales	Polytrichopsida	Bryophyta	Plantae	thin soil Nardetum (over silicate rock)	Silicate
196m	196	Moss	46.8733	13.7285	Bryum pallescens	Ptychostomum	Bryaceae	Bryales	Bryopsida	Bryophyta	Plantae	silicate rock	Group-4
197m	197	Moss	46.8747	13.7266	Sphagnum capillifolium	Sphagnum	Sphagnaceae	Sphagnales	Sphagnopsida	Bryophyta	Plantae	Swamp	Group-3
198m	198	Moss	46.8747	13.7266	Polytrichum strictum	Polytrichum	Polytrichaceae	Polytrichales	Polytrichopsida	Bryophyta	Plantae	Sphagnum hummock	Group-3
199m	199	Moss	46.8747	13.7265	Bryum elegans	Ptychostomum	Bryaceae	Bryales	Bryopsida	Bryophyta	Plantae	snowbed	Group-4
200m	200	Moss	46.8757	13.725	Polytrichum alpinum	Polytrichum	Polytrichaceae	Polytrichales	Polytrichopsida	Bryophyta	Plantae	Rock scree	Group-4
201m	201	Moss	46.8776	13.7286	Nardia scalaris	Nardia	Gymnomitriaceae	Jungermanniales	Jungermanniopsida	Marchantiophyta	Plantae	Nardetum	Silicate
202m	202	Moss	46.8784	13.7297	Pogonatum urnigerum	Pogonatum	Polytrichaceae	Polytrichales	Polytrichopsida	Bryophyta	Plantae	wet Nardetum	Silicate
203m	203	Moss	46.8784	13.7297	Dicranum scoparium	Dicranum	Dicranaceae	Dicranales	Bryopsida	Bryophyta	Plantae	open deep soil	Silicate
204m	204	Moss	46.8785	13.7298	Sanionia uncinata	Sanionia	Amblystegiaceae	Hypnales	Bryopsida	Bryophyta	Plantae	Dwarf shrub heath	Silicate
205m	205	Moss	46.8784	13.7303	Sciuro-hypnum starkei	Sciuro-hypnum	Brachytheciaceae	Hypnales	Bryopsida	Bryophyta	Plantae	open larch forest	Group-4
206m	206	Moss	46.8784	13.7306	Warnstorfia exannulata	Warnstorfia	Amblystegiaceae	Hypnales	Bryopsida	Bryophyta	Plantae	fen hollow	Group-3
207m	207	Moss	46.8784	13.7306	Dicranella palustris	Dicranella	Rhabdoweisiaceae	Dicranales	Bryopsida	Bryophyta	Plantae	Stream edge	Group-3
208m	208	Moss	46.8786	13.7309	Sphagnum angustifolium	Sphagnum	Sphagnaceae	Sphagnales	Sphagnopsida	Bryophyta	Plantae	fen hollow	Group-3
209m	209	Moss	46.8786	13.731	Bryum pseudotriquetrum	Ptychostomum	Bryaceae	Bryales	Bryopsida	Bryophyta	Plantae	spring	Group-3
210m	210	Moss	46.8785	13.7316	Tortella tortuosa	Tortella	Pottiaceae	Pottiales	Bryopsida	Bryophyta	Plantae	calcareous rocky grassland	Carbonate
211m	211	Moss	46.8785	13.7317	Ditrichum flexuicaule	Ditrichum	Flexitrichaceae	Pseudoditrichales	Bryopsida	Bryophyta	Plantae	calcareous rock fissure	Carbonate
212m	212	Moss	46.8785	13.7318	Schistidium apocarpum	Schistidium	Grimmiaceae	Grimmiales	Bryopsida	Bryophyta	Plantae	calcareous rock fissure	Carbonate
213m	213	Moss	46.8785	13.7317	Ctenidium molluscum	Ctenidium	Myuriaceae	Hypnales	Bryopsida	Bryophyta	Plantae	calcareous rocky grassland	Carbonate
214m	214	Moss	46.8784	13.7321	Ditrichum flexuicaule	Ditrichum	Flexitrichaceae	Pseudoditrichales	Bryopsida	Bryophyta	Plantae	calcareous rock fissure	Carbonate
215m	215	Moss	46.8784	13.7321	Tortella tortuosa	Tortella	Pottiaceae	Pottiales	Bryopsida	Bryophyta	Plantae	calcareous rock fissure	Carbonate
216m	216	Moss	46.8784	13.7321	Racomitrium canescens	Racomitrium	Grimmiaceae	Grimmiales	Bryopsida	Bryophyta	Plantae	calcareous rocky grassland	Carbonate
217m	217	Moss	46.876	13.7348	Stegonia latifolia	Stegonia	Pottiaceae	Pottiales	Bryopsida	Bryophyta	Plantae	calcareous rocky grassland	Carbonate
218m	218	Moss	46.8759	13.7353	Bryum schleicheri	Ptychostomum	Bryaceae	Bryales	Bryopsida	Bryophyta	Plantae	Stream edge	Group-3
219m	219	Moss	46.8759	13.7353	Cratoneuron filicinum	Cratoneuron	Amblystegiaceae	Hypnales	Bryopsida	Bryophyta	Plantae	Stream edge	Group-3
220m	220	Moss	46.8761	13.7436	Ctenidium molluscum	Ctenidium	Myuriaceae	Hypnales	Bryopsida	Bryophyta	Plantae	calcareous rocky grassland	Carbonate
221m	221	Moss	46.8764	13.7438	Hymenostylium recurvirostrum	Hymenostylium	Pottiaceae	Pottiales	Bryopsida	Bryophyta	Plantae	moist calcareous rock fissure	Carbonate
222m	222	Moss	46.8765	13.7442	Fissidens dubius	Fissidens	Fissidentaceae	Dicranales	Bryopsida	Bryophyta	Plantae	calcareous rocky grassland	Carbonate
223m	223	Moss	46.8773	13.7503	Aulacomnium palustre	Aulacomnium	Aulacomniaceae	Rhizogoniales	Bryopsida	Bryophyta	Plantae	Sphagnum hummock	Group-3
224m	224	Moss	46.8772	13.7504	Sphagnum magellanicum	Sphagnum	Sphagnaceae	Sphagnales	Sphagnopsida	Bryophyta	Plantae	Sphagnum hummock	Group-3
225m	225	Moss	46.8771	13.7505	Warnstorfia exannulata	Warnstorfia	Amblystegiaceae	Hypnales	Bryopsida	Bryophyta	Plantae	Sphagnum hollow	Group-3
226m	226	Moss	46.8771	13.7505	Sphagnum angustifolium	Sphagnum	Sphagnaceae	Sphagnales	Sphagnopsida	Bryophyta	Plantae	Sphagnum hollow	Group-3
227m	227	Moss	46.8767	13.7506	Sphagnum subsecundum	Sphagnum	Sphagnaceae	Sphagnales	Sphagnopsida	Bryophyta	Plantae	Sphagnum hollow	Group-3
228m	228	Moss	46.8762	13.7507	Sphagnum subsecundum	Sphagnum	Sphagnaceae	Sphagnales	Sphagnopsida	Bryophyta	Plantae	Sphagnum hollow	Group-3
229m	229	Moss	46.8758	13.7509	Climacium dendroides	Climacium	Climaciaceae	Hypnales	Bryopsida	Bryophyta	Plantae	fen hollow	Group-3
230m	230	Moss	46.8746	13.7501	Rhytidium rugosum	Rhytidium	Rhytidiaceae	Hypnales	Bryopsida	Bryophyta	Plantae	calcareous rock fissure	Carbonate
231m	231	Moss	46.8719	13.7512	Philonotis fontata	Philonotis	Bartramiaceae	Bartramiales	Bryopsida	Bryophyta	Plantae	Stream edge	Group-3
232m	232	Moss	46.8697	13.7516	Calliergonella cuspidata	Calliergonella	Pylaisiaceae	Hypnales	Bryopsida	Bryophyta	Plantae	fen hollow	Group-3
181p	181	Vascular Plant	46.8672	13.7338	Deschampsia flexuosa	Deschampsia	Poaceae	Poales	Liliopsida	Tracheophyta	Plantae	thin soil Nardetum (over silicate rock)	Silicate
182p	182	Vascular Plant	46.8671	13.7338	Vaccinium myrtillus	Vaccinium	Ericaceae	Ericales	Magnoliopsida	Tracheophyta	Plantae	thin soil Nardetum (over silicate rock)	Silicate
183p	183	Vascular Plant	46.8672	13.7336	Homogyne alpina	Homogyne	Asteraceae	Asterales	Magnoliopsida	Tracheophyta	Plantae	thin soil Nardetum (over silicate rock)	Silicate
184p	184	Vascular Plant	46.8672	13.7336	Luzula luzuloides	Luzula	Juncaceae	Poales	Liliopsida	Tracheophyta	Plantae	thin soil Nardetum (over silicate rock)	Silicate
185p	185	Vascular Plant	46.8682	13.733	Rhododendron ferrugineum	Rhododendron	Ericaceae	Ericales	Magnoliopsida	Tracheophyta	Plantae	Dwarf shrub heath	Silicate
186p	186	Vascular Plant	46.8683	13.733	Calluna vulgaris	Calluna	Ericaceae	Ericales	Magnoliopsida	Tracheophyta	Plantae	thin soil over silicate rock	Silicate
187p	187	Vascular Plant	46.8688	13.7326	Sempervivum stiriacum	Sempervivum	Crassulaceae	Saxifragales	Magnoliopsida	Tracheophyta	Plantae	silicate rock	Group-4
188p	188	Vascular Plant	46.8693	13.7322	Vaccinium vitis-idea	Vaccinium	Ericaceae	Ericales	Magnoliopsida	Tracheophyta	Plantae	Dwarf shrub heath	Silicate
189p	189	Vascular Plant	46.8695	13.7323	Vaccinium vitis-idea	Vaccinium	Ericaceae	Ericales	Magnoliopsida	Tracheophyta	Plantae	Dwarf shrub heath	Silicate
190p	190	Vascular Plant	46.8699	13.7323	Hypochoeris uniflora	Hypochoeris	Asteraceae	Asterales	Magnoliopsida	Tracheophyta	Plantae	Nardetum	Silicate
191p	191	Vascular Plant	46.8699	13.7323	Galium anisophyllum	Galium	Rubiaceae	Gentianales	Magnoliopsida	Tracheophyta	Plantae	Nardetum	Silicate
192p	192	Vascular Plant	46.87	13.7323	Phyteuma hemisphaericum	Phyteuma	Campanulaceae	Campanulales	Magnoliopsida	Tracheophyta	Plantae	Silicate rock fissure	Group-4
193p	193	Vascular Plant	46.8709	13.7308	Festuca rubra	Festuca	Poaceae	Poales	Liliopsida	Tracheophyta	Plantae	Nardetum	Silicate
194p	194	Vascular Plant	46.871	13.7306	Vaccinium uliginosum	Vaccinium	Ericaceae	Ericales	Magnoliopsida	Tracheophyta	Plantae	Nardetum	Silicate
195p	195	Vascular Plant	46.8717	13.7294	Primula minima	Primula	Primulaceae	Ericales	Magnoliopsida	Tracheophyta	Plantae	thin soil Nardetum (over silicate rock)	Silicate
196p	196	Vascular Plant	46.8733	13.7285	Silene acaulis	Silene	Caryophyllaceae	Caryophyllales	Magnoliopsida	Tracheophyta	Plantae	silicate rock	Group-4
197p	197	Vascular Plant	46.8747	13.7266	Carex nigra	Carex	Cyperaceae	Poales	Liliopsida	Tracheophyta	Plantae	Swamp	Group-3
198p	198	Vascular Plant	46.8747	13.7266	Vaccinium myrtillus	Vaccinium	Ericaceae	Ericales	Magnoliopsida	Tracheophyta	Plantae	Sphagnum hummock	Group-3
199p	199	Vascular Plant	46.8747	13.7265	Sibbaldia procumbens	Sibbaldia	Rosaceae	Rosales	Magnoliopsida	Tracheophyta	Plantae	snowbed	Group-4
200p	200	Vascular Plant	46.8757	13.725	Huperzia selago	Huperzia	Lycopodiaceae	Selaginellales	Lycopodiopsida	Tracheophyta	Plantae	Rock scree	Group-4
201p	201	Vascular Plant	46.8776	13.7286	Campanula barbata	Campanula	Campanulaceae	Campanulales	Magnoliopsida	Tracheophyta	Plantae	Nardetum	Silicate
202p	202	Vascular Plant	46.8784	13.7297	Pinguicula vulgaris	Pinguicula	Lentibulariaceae	Lamiales	Magnoliopsida	Tracheophyta	Plantae	wet Nardetum	Silicate
203p	203	Vascular Plant	46.8784	13.7297	Pulsatilla alpina	Pulsatilla	Ranunculaceae	Ranunculales	Magnoliopsida	Tracheophyta	Plantae	open deep soil	Silicate
204p	204	Vascular Plant	46.8785	13.7298	Loiseleuria procumbens	Loiseleuria	Ericaceae	Ericales	Magnoliopsida	Tracheophyta	Plantae	Dwarf shrub heath	Silicate
205p	205	Vascular Plant	46.8784	13.7303	Veratrum album	Veratrum	Melanthiaceae	Liliales	Magnoliopsida	Tracheophyta	Plantae	open larch forest	Group-4
206p	206	Vascular Plant	46.8784	13.7306	Eriophorum angustifoium	Eriophorum	Cyperaceae	Poales	Liliopsida	Tracheophyta	Plantae	fen hollow	Group-3
207p	207	Vascular Plant	46.8784	13.7306	Soldanella alpine	Soldanella	Primulaceae	Ericales	Magnoliopsida	Tracheophyta	Plantae	Stream edge	Group-3
208p	208	Vascular Plant	46.8786	13.7309	Swertia perennis	Swertia	Gentianaceae	Gentianales	Magnoliopsida	Tracheophyta	Plantae	fen hollow	Group-3
209p	209	Vascular Plant	46.8786	13.731	Saxifraga stellaris	Saxifraga	Saxifragaceae	Saxifragales	Magnoliopsida	Tracheophyta	Plantae	spring	Group-3
210p	210	Vascular Plant	46.8785	13.7316	Dryas octopetala	Dryas	Rosaceae	Rosales	Magnoliopsida	Tracheophyta	Plantae	calcareous rocky grassland	Carbonate
211p	211	Vascular Plant	46.8785	13.7317	Carex firma	Carex	Cyperaceae	Poales	Liliopsida	Tracheophyta	Plantae	calcareous rock fissure	Carbonate
212p	212	Vascular Plant	46.8785	13.7318	Helianthemum alpestre	Helianthemum	Cistaceae	Malvales	Magnoliopsida	Tracheophyta	Plantae	calcareous rock fissure	Carbonate
213p	213	Vascular Plant	46.8785	13.7317	Gentiana clusii	Gentiana	Gentianaceae	Gentianales	Magnoliopsida	Tracheophyta	Plantae	calcareous rocky grassland	Carbonate
214p	214	Vascular Plant	46.8784	13.7321	Asplenium viride	Asplenium	Aspleniaceae	Polypodiales	Polypodiopsida	Pteridophyta	Plantae	calcareous rock fissure	Carbonate
215p	215	Vascular Plant	46.8784	13.7321	Primula auricula	Primula	Primulaceae	Ericales	Magnoliopsida	Tracheophyta	Plantae	calcareous rock fissure	Carbonate
216p	216	Vascular Plant	46.8784	13.7321	Thymus praecox	Thymus	Lamiaceae	Lamiales	Magnoliopsida	Tracheophyta	Plantae	calcareous rocky grassland	Carbonate
217p	217	Vascular Plant	46.876	13.7348	Polygala amara	Polygala	Polygalaceae	Polygalales	Magnoliopsida	Tracheophyta	Plantae	calcareous rocky grassland	Carbonate
218p	218	Vascular Plant	46.8759	13.7353	Cardamine amara	Cardamine	Brassicaceae	Brassicales	Magnoliopsida	Tracheophyta	Plantae	Stream edge	Group-3
219p	219	Vascular Plant	46.8759	13.7353	Caltha palustris	Caltha	Ranunculaceae	Ranunculales	Magnoliopsida	Tracheophyta	Plantae	Stream edge	Group-3
220p	220	Vascular Plant	46.8761	13.7436	Biscutella laevigata	Biscutella	Brassicaceae	Brassicales	Magnoliopsida	Tracheophyta	Plantae	calcareous rocky grassland	Carbonate
221p	221	Vascular Plant	46.8764	13.7438	Heliosperma pusillum	Heliosperma	Caryophyllaceae	Caryophyllales	Magnoliopsida	Tracheophyta	Plantae	moist calcareous rock fissure	Carbonate
222p	222	Vascular Plant	46.8765	13.7442	Globularia cordifolia	Globularia	Plantaginaceae	Asterales	Magnoliopsida	Tracheophyta	Plantae	calcareous rocky grassland	Carbonate
223p	223	Vascular Plant	46.8773	13.7503	Potentilla erecta	Potentilla	Rosaceae	Rosales	Magnoliopsida	Tracheophyta	Plantae	Sphagnum hummock	Group-3
224p	224	Vascular Plant	46.8772	13.7504	Calluna vulgaris	Calluna	Ericaceae	Ericales	Magnoliopsida	Tracheophyta	Plantae	Sphagnum hummock	Group-3
225p	225	Vascular Plant	46.8771	13.7505	Pinguicula vulgaris	Pinguicula	Lentibulariaceae	Lamiales	Magnoliopsida	Tracheophyta	Plantae	Sphagnum hollow	Group-3
226p	226	Vascular Plant	46.8771	13.7505	Epilobium palustre	Epilobium	Onagraceae	Myrtales	Magnoliopsida	Tracheophyta	Plantae	Sphagnum hollow	Group-3
227p	227	Vascular Plant	46.8767	13.7506	Trichophorum cespitosum	Trichophorum	Cyperaceae	Poales	Liliopsida	Tracheophyta	Plantae	Sphagnum hollow	Group-3
228p	228	Vascular Plant	46.8762	13.7507	Drosera rotundifolia	Drosera	Droseraceae	Caryophyllales	Magnoliopsida	Tracheophyta	Plantae	Sphagnum hollow	Group-3
229p	229	Vascular Plant	46.8758	13.7509	Willemetia stipitata	Willemetia	Caryophyllaceae	Caryophyllales	Magnoliopsida	Tracheophyta	Plantae	fen hollow	Group-3
230p	230	Vascular Plant	46.8746	13.7501	Phyteuma orbiculare	Phyteuma	Campanulaceae	Campanulales	Magnoliopsida	Tracheophyta	Plantae	calcareous rock fissure	Carbonate
231p	231	Vascular Plant	46.8719	13.7512	Fragaria vesca	Fragaria	Rosaceae	Rosales	Magnoliopsida	Tracheophyta	Plantae	Stream edge	Group-3
232p	232	Vascular Plant	46.8697	13.7516	Allium schoenoprasum	Allium	Amaryllidaceae	Asparagales	Liliopsida	Tracheophyta	Plantae	fen hollow	Group-3
